# Supplementary material for: A Cross-Sectional Study on the Occurrence of the Intestinal Protist, Dientamoeba fragilis, in the Gut-Healthy Volunteers and Their Animals
Source: MDPI journal article supplement (doi:10.3390/ijms232315407), 2022-12-06
Supplement: s1 [file s1]

## Supplementary material

**Supplementary Data S1.** Comparison of the sensitivity of conventional PCR (cPCR) and real-time PCR (qPCR) for the detection of *Dientamoeba fragilis* in human samples (N=296) using McNemar test ( $p < 0.05$ ;  $\chi^2 = 49$ ).

|      |          | qPCR      |            |            |
|------|----------|-----------|------------|------------|
|      |          | positive  | negative   |            |
| cPCR | positive | 22        | 0          | 22(7 %)    |
|      | negative | 50        | 224        | 274 (93 %) |
|      |          | 72 (24 %) | 224 (82 %) | 296        |
